# Supplementary material for: Research note: The COVID-19 pandemic and its effects on scientific work in German sociology
Source: publisher site journal article supplement (doi:10.1515/zfsoz-2021-0023), 2021-11-26
Supplement: Supplementary file 1 [file Keil-Sawert_Online-Anhang.pdf › Keil-Sawert_Online-Anhang.pdf]

**Online-Appendix:****Table A1: Overview of participation rate and development of number of observations**

|   | N                                      |      |          |          |                   |
|---|----------------------------------------|------|----------|----------|-------------------|
| A | Invited to participate in survey       | 1027 |          |          |                   |
| B | Accessed starting page                 | 328  | 32% of A |          |                   |
| C | Started survey                         | 283  | 28% of A | 86% of B |                   |
| D | Finished survey                        | 278  | 27% of A | 85% of B | 98% of C          |
| E | Without item non-response <sup>1</sup> | 260  | 25% of A | 79% of B | 92% of C 94% of D |

**Description of the dataset (Original formulation of questions and distributions):**

Note: All distributions are based on the sample after listwise deletion of item-nonresponse, N=260.

Variable b11: *Please remember your research activities of the past four weeks. To what extent have the measures to contain the COVID-19 pandemic restricted your research work?*

| Original coding | Absolute Frequency | Relative frequency (%) | Recoded to...     |   |
|-----------------|--------------------|------------------------|-------------------|---|
| 1 Not at all    | 18                 | 6,9                    | Not (very) severe | 0 |
| 2 Slightly      | 48                 | 18,5                   |                   | 0 |
| 3 Moderately    | 62                 | 23,8                   |                   | 0 |
| 4 Severely      | 67                 | 25,8                   | (Very) severe     | 1 |
| 5 Very severely | 65                 | 25,0                   |                   | 1 |
|                 | 260                | 100,0                  |                   |   |

Variable b12: *To what extent do you agree with the following statement? Due to the restrictions on the containment of the COVID-19 pandemic, I will be able to do less research this year.*

| Original coding     | Absolute Frequency | Relative frequency (%) | Recoded to...          |   |
|---------------------|--------------------|------------------------|------------------------|---|
| 1 Strongly disagree | 28                 | 10,8                   | Don't (strongly) agree | 0 |
| 2 Disagree          | 63                 | 24,2                   |                        | 0 |
| 3 Agree             | 78                 | 30,0                   | (Strongly) agree       | 1 |
| 4 Strongly agree    | 91                 | 35,0                   |                        | 1 |
|                     | 260                | 100,0                  |                        |   |

Variable b13: *A concrete end to the restrictive measures is currently not foreseeable. Please imagine that the measures currently in place will largely continue to apply for the next three months. How much would this limit your research activities?*

| Original coding | Absolute Frequency | Relative frequency (%) | Recoded to...     |   |
|-----------------|--------------------|------------------------|-------------------|---|
| 1 Not at all    | 17                 | 6,7                    | Not (very) severe | 0 |
| 2 Slightly      | 41                 | 15,8                   |                   | 0 |
| 3 Moderately    | 57                 | 21,9                   |                   | 0 |
| 4 Severely      | 72                 | 27,7                   | (Very) severe     | 1 |
| 5 Very severely | 73                 | 28,1                   |                   | 1 |
|                 | 260                | 100,0                  |                   |   |

<sup>1</sup> To check for robustness of our results, we re-run the analysis using single imputation and for the results for associations also multiple imputation as alternative handling-strategies for the missing values. The results did not change substantially. Results are available upon request from the authors.

Variable b111: *Please remember your research activities of the past four weeks. To what extent have they been hindered because of an increased workload in teaching? (Only respondents with teaching obligations)*

| Original coding | Absolute Frequency | Relative frequency (%) | Recoded to...       |
|-----------------|--------------------|------------------------|---------------------|
| 1 Not at all    | 2                  | 1,0                    | Not (very) severe 0 |
| 2 Slightly      | 12                 | 5,8                    | 0                   |
| 3 Moderately    | 82                 | 40,0                   | 0                   |
| 4 Severely      | 44                 | 21,4                   | (Very) severe 1     |
| 5 Very severely | 65                 | 31,7                   | 1                   |
|                 | 205                | 100,0                  |                     |

Variable b112: *Please remember your research activities of the past four weeks. To what extent have they been hindered because of an increased administrative workload?*

| Original coding | Absolute Frequency | Relative frequency (%) | Recoded to...       |
|-----------------|--------------------|------------------------|---------------------|
| 1 Not at all    | 26                 | 10,0                   | Not (very) severe 0 |
| 2 Slightly      | 125                | 48,1                   | 0                   |
| 3 Moderately    | 41                 | 15,8                   | 0                   |
| 4 Severely      | 44                 | 16,9                   | (Very) severe 1     |
| 5 Very severely | 24                 | 9,2                    | 1                   |
|                 | 260                | 100,0                  |                     |

Variable b113: *Please remember your research activities of the past four weeks. To what extent have they been hindered because of an increased childcare?*

| Original coding | Absolute Frequency | Relative frequency (%) | Recoded to...       |
|-----------------|--------------------|------------------------|---------------------|
| 1 Not at all    | 7                  | 5,7                    | Not (very) severe 0 |
| 2 Slightly      | 12                 | 9,9                    | 0                   |
| 3 Moderately    | 17                 | 13,9                   | 0                   |
| 4 Severely      | 12                 | 9,8                    | (Very) severe 1     |
| 5 Very severely | 74                 | 60,7                   | 1                   |
|                 | 122                | 100,0                  |                     |

Variable b114: *Please remember your research activities of the past four weeks. To what extent have they been hindered because of problems to communicate with colleagues?*

| Original coding | Absolute Frequency | Relative frequency (%) | Recoded to...       |
|-----------------|--------------------|------------------------|---------------------|
| 1 Not at all    | 94                 | 36,2                   | Not (very) severe 0 |
| 2 Slightly      | 46                 | 17,7                   | 0                   |
| 3 Moderately    | 60                 | 23,1                   | 0                   |
| 4 Severely      | 43                 | 16,5                   | (Very) severe 1     |
| 5 Very severely | 17                 | 6,5                    | 1                   |
|                 | 260                | 100,0                  |                     |

Variable b115: *Please remember your research activities of the past four weeks. To what extent have they been hindered because of working from home-office?*

| Original coding | Absolute Frequency | Relative frequency (%) | Recoded to...       |
|-----------------|--------------------|------------------------|---------------------|
| 1 Not at all    | 93                 | 35,8                   | 0                   |
| 2 Slightly      | 24                 | 9,2                    | Not (very) severe 0 |
| 3 Moderately    | 29                 | 11,2                   | 0                   |
| 4 Severely      | 48                 | 18,5                   | (Very) severe 1     |
| 5 Very severely | 66                 | 25,4                   | 1                   |
|                 | 260                | 100,0                  |                     |

Variable b116: *Please remember your research activities of the past four weeks. To what extent have they been hindered because of restricted access to literature?*

| Original coding | Absolute Frequency | Relative frequency (%) | Recoded to...       |
|-----------------|--------------------|------------------------|---------------------|
| 1 Not at all    | 115                | 44,2                   | 0                   |
| 2 Slightly      | 42                 | 16,2                   | Not (very) severe 0 |
| 3 Moderately    | 45                 | 17,2                   | 0                   |
| 4 Severely      | 29                 | 11,2                   | (Very) severe 1     |
| 5 Very severely | 29                 | 11,2                   | 1                   |
|                 | 260                | 100,0                  |                     |

Variable b117: *Please remember your research activities of the past four weeks. To what extent have they been hindered because of restricted travel opportunities?*

| Original coding | Absolute Frequency | Relative frequency (%) | Recoded to...       |
|-----------------|--------------------|------------------------|---------------------|
| 1 Not at all    | 108                | 41,6                   | 0                   |
| 2 Slightly      | 44                 | 16,9                   | Not (very) severe 0 |
| 3 Moderately    | 31                 | 11,9                   | 0                   |
| 4 Severely      | 25                 | 9,6                    | (Very) severe 1     |
| 5 Very severely | 52                 | 20,0                   | 1                   |
|                 | 260                | 100,0                  |                     |

Variable b118: *Please remember your research activities of the past four weeks. To what extent have they been hindered because of restricted options to collect primary data? (N=229 because 11 respondents are not working empirically, and 20 respondents are only using secondary data).*

| Original coding | Absolute Frequency | Relative frequency (%) | Recoded to...       |
|-----------------|--------------------|------------------------|---------------------|
| 1 Not at all    | 113                | 49,3                   | 0                   |
| 2 Slightly      | 18                 | 7,9                    | Not (very) severe 0 |
| 3 Moderately    | 24                 | 10,5                   | 0                   |
| 4 Severely      | 28                 | 12,2                   | (Very) severe 1     |
| 5 Very severely | 46                 | 20,1                   | 1                   |
|                 | 229                | 100,0                  |                     |

Variable b14: *Please think about your main methods you are using for analysing data. Are they rather qualitative methods or quantitative?*

| Original coding                          | Absolute Frequency | Relative frequency (%) | Recoded to... |   |
|------------------------------------------|--------------------|------------------------|---------------|---|
| 0 Working theoretically, not empirically | 11                 | 4,2                    | Theoretical   | 1 |
| 1 Only qualitative                       | 61                 | 23,4                   | Qualitative   | 2 |
| 2 Primarily qualitative                  | 68                 | 26,2                   |               | 2 |
| 3 Both equally                           | 24                 | 9,2                    | Mixed         | 3 |
| 4 Primarily quantitative                 | 42                 | 16,2                   | Quantitative  | 4 |
| 5 Only quantitative                      | 54                 | 20,8                   |               | 4 |
|                                          | 260                | 100,0                  |               |   |

Variable b16: *Please think about your main kind of data you are using. Are you rather using primary or secondary data? (N=249 because 11 respondents are not working empirically)*

| Original coding            | Absolute Frequency | Relative frequency (%) | Recoded to... |   |
|----------------------------|--------------------|------------------------|---------------|---|
| 1 Only secondary data      | 20                 | 8,0                    |               | 0 |
| 2 Primarily secondary data | 98                 | 39,3                   | Secondary     | 0 |
| 3 Both equally             | 38                 | 15,3                   |               | 0 |
| 4 Primarily primary data   | 47                 | 18,9                   | Primary       | 1 |
| 5 Only primary data        | 46                 | 18,5                   |               | 1 |
|                            | 249                | 100,0                  |               |   |

Variable b17: *Was a data-collection planned during the last two months? (N=249 because 11 respondents are not working empirically)*

| Original coding                              | Absolute Frequency | Relative frequency (%) | Recoded to... |   |
|----------------------------------------------|--------------------|------------------------|---------------|---|
| 1 No                                         | 120                | 48,2                   | No            | 0 |
| 2 Yes, it was not be realised                | 81                 | 32,5                   |               | 1 |
| 3 Yes, it was be realised with some problems | 39                 | 15,7                   | Yes           | 1 |
| 4 Yes, it was realised without problems      | 9                  | 3,6                    |               | 1 |
|                                              | 249                | 100,0                  |               |   |

Variable b31: *Let us now switch to academic teaching. Do you have to teach during the summer semester 2020?*

| Original coding | Absolute Frequency | Relative frequency (%) | Recoded to... |   |
|-----------------|--------------------|------------------------|---------------|---|
| 1 No            | 55                 | 21,2                   | No            | 0 |
| 2 Yes           | 205                | 78,8                   | Yes           | 1 |
|                 | 260                | 100,0                  |               |   |

Variable b51: *In which year have you been born? → generated variable: age in 2020 (metric), N=260*

| Mean | Median | Std. Dev. | Variance |
|------|--------|-----------|----------|
| 1976 | 1978   | 9,1       | 83,1     |

Variable b52: *What is your gender?*

| Original coding |       | Absolute Frequency | Relative frequency (%) | Recoded to... |   |
|-----------------|-------|--------------------|------------------------|---------------|---|
| 1               | Women | 116                | 44,3                   | Women         | 1 |
| 2               | Men   | 141                | 54,2                   | Men           | 2 |
| 3               | Other | 4                  | 1,5                    | Other         | 3 |
|                 |       | 260                | 100,0                  |               |   |

Variable b53: *To which of the following academic status groups do you belong?*

| Original coding |                              | Absolute Frequency | Relative frequency (%) | Recoded to...           |   |
|-----------------|------------------------------|--------------------|------------------------|-------------------------|---|
| 1               | W3-professor                 | 68                 | 26,2                   | Full professor          | 1 |
| 2               | W2-professor                 | 36                 | 13,8                   |                         | 2 |
| 3               | W1-professor                 | 11                 | 4,2                    |                         | 2 |
| 4               | Junior-research-group-leader | 4                  | 1,5                    | group leader            | 2 |
| 5               | Postdoctoral researcher      | 122                | 46,9                   | Postdoctoral researcher | 3 |
| 6               | Private lecturer             | 6                  | 2,3                    | Other                   | 4 |
| 7               | Other                        | 13                 | 5,0                    |                         | 4 |
|                 |                              | 260                | 100,0                  |                         |   |

Variable b54: *Which of the following persons are living in your household [generated variable: youngest child in household]?*

| Original coding |                           | Absolute Frequency | Relative frequency (%) | Recoded to... |   |
|-----------------|---------------------------|--------------------|------------------------|---------------|---|
| 1               | None                      | 138                | 53,0                   | None          | 0 |
| 2               | Children under 7 years    | 53                 | 20,4                   | <7 years      | 1 |
| 3               | Children between 7 and 14 | 42                 | 16,2                   | 7-14          | 2 |
| 4               | Children older than 14    | 27                 | 10,4                   | >14           | 3 |
|                 |                           | 260                | 100,0                  |               |   |

Variable b55: *Do you belong to the Covid-19 risk-group?*

| Original coding |     | Absolute Frequency | Relative frequency (%) | Recoded to... |   |
|-----------------|-----|--------------------|------------------------|---------------|---|
| 1               | No  | 222                | 85,4                   | No            | 0 |
| 2               | Yes | 38                 | 14,6                   | Yes           | 1 |
|                 |     | 260                | 100,0                  |               |   |
